# Supplementary figures and images for: Acupuncture Effect Assessment in APP/PS1 Transgenic Mice: On Regulating Learning-Memory Abilities, Gut Microbiota, and Microbial Metabolites
Source: Hindawi journal article supplement (doi:10.1155/2022/1527159), 2022-04-08

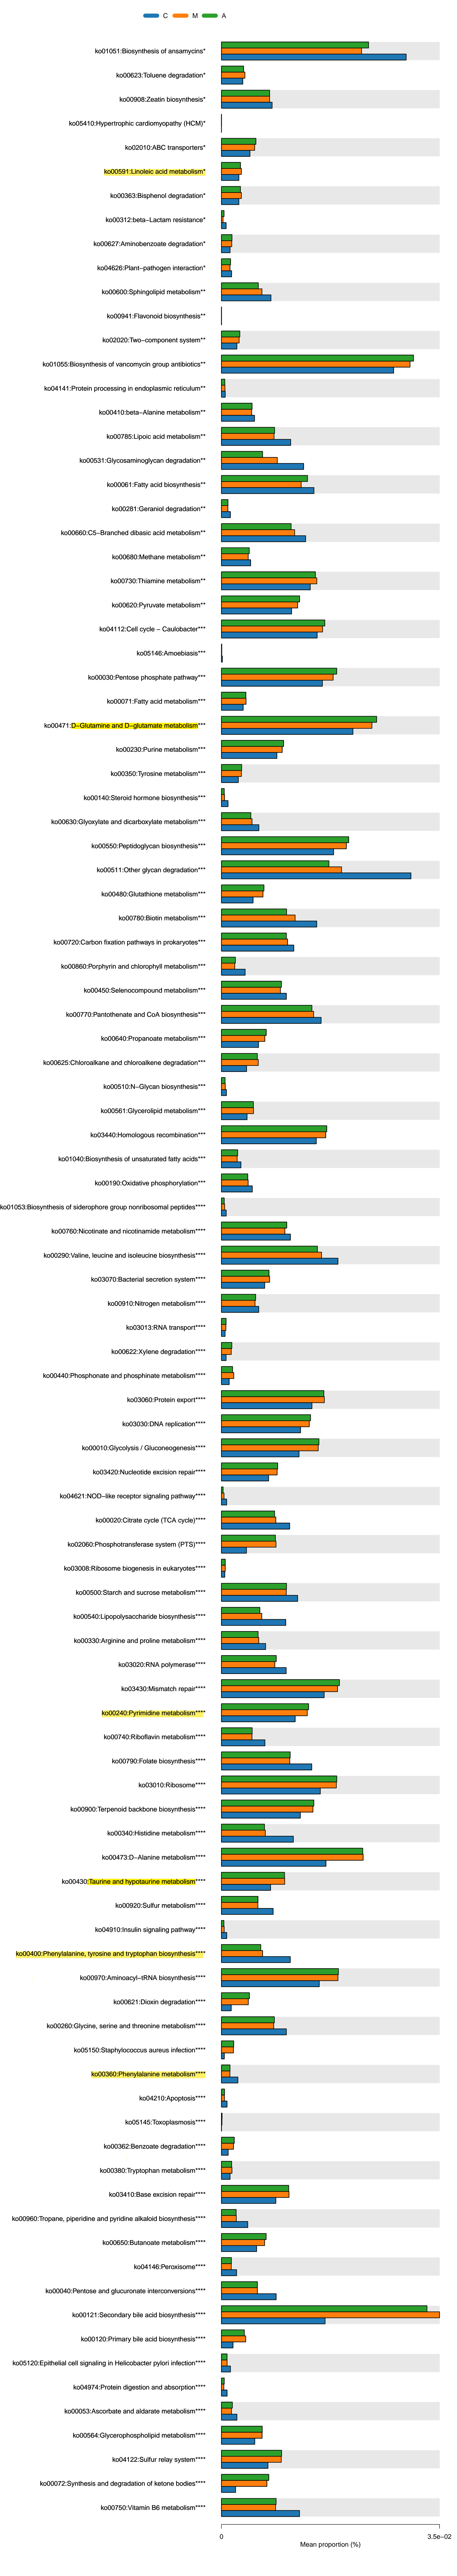

Supplement: f1 [file 1527159.f1.pdf]
